# Supplementary material for: Anti-Inflammatory Compounds from Vietnamese Piper bavinum
Source: Hindawi journal article supplement (doi:10.1155/2020/1038636), 2020-02-08
Supplement: f1 [file 1038636.f1.doc]

**Anti-inflammatory Compounds from Vietnamese *Piper bavinum***

**Hoang Viet Dung,3 Phi Hung Nguyen,4 Minh Thu Doan,5 Manh Hung Tran,5 Nhu Tuan Huynh,6 Nguyen Huu Tung,1,2 Byung Sun Min,7 and Dao Cuong To1,2**

*1 Faculty of Pharmacy, Phenikaa University, Yen Nghia, Ha Dong district, Hanoi 12116, Vietnam*

*2 Phenikaa Research and Technology Institute (PRATI), A&A Green Phoenix Group JSC, 167 Hoang Ngan, Cau Giay District, Hanoi 11313, Vietnam*

*3 Institute of Pharmaceutical Training, Vietnam Military Medical University, 160 Phung Hung Street, Hadong District, Hanoi 151000, Vietnam*

*4 Institute of Natural Products Chemistry, Vietnam Academy of Science and Technology (VAST), 18 Hoang Quoc Viet, Cau Giay district, Hanoi 122100, Vietnam*

*5 Department of Biomedical Sciences, Institute for Research and Executive Education (VNUK), The University of Danang, 158A Le Loi Street, Hai Chau District, Da Nang 551000, Vietnam*

*6 Faculty of Pharmacy, Dong A University, 33 Xo Viet Nghe Tinh, Hai Chau District, Da Nang 550000, Vietnam*

*7 College of Pharmacy, Drug Research and Development Center, Catholic University of Daegu, Gyeongsan 712–702, Korea*

Correspondence should be addressed to Dao C. To; [cuong.todao@phenikaa-uni.edu.vn](mailto:cuong.todao@phenikaa-uni.edu.vn)

**List of Contents**

**2.** **Materials and Methods**

**Figure S1.** HR-ESI mass spectrum of compound **1**.

**Figure S2.** HR-FAB mass spectrum of compound **4**.

**Figure S3.** HR-ESI mass spectrum of compound **6**.

**Figure S4.** HR-ESI mass spectrum of compound **7**.

**Figure S5.** HR-ESI mass spectrum of compound **8**.

**2.** **Materials and Methods**

*2.1. General Experimental Procedures*.Optical rotations were measured using a JASCO DIP 370 digital polarimeter. UV spectra were recorded in MeOH using a Thermo spectrometer. IR spectra were obtained using a Fourier Transform infrared spectrometer (Brucker Instrument, Inc., German). 1D-and 2D-NMR spectra were obtained using a Varian Unity Inova 400 MHz spectrometer with tetramethylsilane (TMS) as the internal standard, and the chemical shifts were recorded in ** values (ppm). High-resolution electron impact ionization mass spectrometry (HR-EI-MS) and high resolution fast-atom bombardment mass spectroscopy (HR-FAB-MS) were recorded using JEOL JMS-700 MStationTM spectrometer (Germany) and JEOL JMS-AX 300L spectrometer, respectively. Silica gel (Merck, 63200 m particle size) and RP-18 (Merck, 75 m particle size) were used for column chromatography. TLC was carried out using Merck silica gel 60 F254 and RP-18 F254 plates. HPLC was conducted using a Waters system (515 pumps), a UV detector (486 Tunable Absorbance), and a YMC Pak ODS-A column (20 × 250 mm, 5 m particle size, YMC Co., Ltd., Japan). HPLC solvents were purchased from Burdick & Jackson (USA).

*2.2. Plant Materials*.The aerial part of *P. bavinum* were harvested at Cuc Phuong National Park, Ninh Binh province, north of Vietnam in April 2011. Botanical identification was performed by Prof. Vu Xuan Phuong, Department of Herbal Specimen, Vietnam Institute of Ecology and Biological Resources. A voucher specimen (HVD 002-11) was deposited at the Department of Specimen, Vietnam Institute of Ecology and Biological Resources.

*2.3. Extraction and Isolation*. The aerial part of *P. bavinum* (14.0 kg) were extracted three times (3 h × 3 L) with methanol (MeOH) refluxing at 60 C. After the solvent was removed under reduced pressure, the residue was suspended in water and then partitioned with *n*-hexane, chloroform (CHCl3), ethyl acetate (EtOAc), and butanol (*n*-BuOH), successively. An activity-guided fractionation study resulted in the *n*-hexaneand EtOAc fractions being chosen for further study. The *n*-hexane soluble fraction (224.0 g) was chromatographic on a silica gel column using a stepwise gradient of *n*-hexane-EtOAc (30:1 to 5:1, each 4.0 L), to yield twelve fractions (Fr.H.1 - Fr.H.12) according to their TLC profiles. Fraction H.4 was applied to a silica gel column, eluting with a gradient of CH2Cl2-EtOAc (100:1 to 10:1), to obtain five fractions (Fr.H.4.1 - Fr.H.4.5). Fraction H.4.4 was subjected to a silica gel column, eluting with *n*-hexane-EtOAc (10:1 to 5:1), to get two sub-fraction (Fr.H.4.4.1 - Fr.H.4.4.2). Further purification of sub-fraction H.4.4.2 by an ODS silica gel column, eluting with MeOH-H­2O (5:1), resulted in the isolation of compound **5** (37.2 mg). They remain seven compounds (**1****4** and **6****8**) were isolated from the aerial part of *P. bavinum* as previously described [6].

*Ampelopsin**(****1****)*: Light yellow powder; [α]Combin + 11.2 (*c* 0.2, MeOH); M.p 247-249 C; UV *λ*max (MeOH): 290 nm; IR (KBr) *ν*max 3477 (OH), 1639 (C=O), 1599, 1458, 1115, 1128, 833 cm-1;HRESIMS *m*/*z* 321.0597 [M + H]+ (Calcd for C15H13O8, 321.0610); 1H-NMR (400 MHz, methanol-*d*4) **H (ppm): 4.82 (1H, d, *J* = 11.2 Hz, H-2), 4.45 (1H, d, *J* = 11.2 Hz, H-3), 5.88 (1H, s, H-6), 5.91 (1H, s, H-8), 6.52 (2H, s, H-2/6); 13C-NMR (100 MHz, methanol-*d*4) **C (ppm): 83.2 (C-2), 71.6 (C-3), 197.7 (C-4), 163.3 (C-5), 95.9 (C-6), 166.8 (C-7), 94.9 (C-8), 162.5 (C-9), 100.5 (C-10), 127.1 (C-1), 106.9 (C-2/6), 145.7 (C-3/5), 133.4 (C-4).

*Violanthin* *(****2****)*: Yellow powder; UV *λ*max (MeOH): 273, 334 nm; IR (KBr) *ν*max3350 (OH), 2928, 1628 (C=O), 1612, 1578, 1512, 1446, 1182, 1116, 1080 cm-1; 1H-NMR (400 MHz, methanol-*d*4) **H (ppm): 7.91 (2H, d, *J* = 8.4 Hz, H-2/6), 6.89 (2H, d, d, *J* = 8.4 Hz, H-3/5), 6.54 (1H, s, H-3), 5.05 (1H, d, *J* = 9.6 Hz, H-1), 5.16 (1H, br s, H-1), 1.40 (3H, d, *J* = 6.4 Hz, 5-CH3); 13C-NMR (100 MHz, methanol-*d*4) **C (ppm): 165.3 (C-2), 102.6 (C-3), 182.6 (C-4), 157.6 (C-5), 109.1 (C-6), 163.1 (C-7), 101.8 (C-8), 155.9 (C-9), 103.6 (C-10), 121.9 (C-1), 128.8 (C-2/6), 115.7 (C-3/5), 161.6 (C-4), 74.0 (C-1), 71.2 (C-2). 79.0 (C-3), 71.3 (C-4), 81.6 (C-5), 61.9 (C-6), 74.5 (C-1), 77.7 (C-2), 78.2 (C-3), 72.1 (C-4), 72.5 (C-5), 17.1 (5-CH3).

*Benzyl benzoate* *(****3****):* White amorphous powder; M.p 17-19 C; UV *λ*max (MeOH): 229 nm; IR (KBr) *ν*max 2949, 1716 (C=O), 1451, 1270, 1109, 913 cm-1; 1H-NMR (400 MHz, CDCl3) **H (ppm): 8.10 (2H, d, *J* = 8.0 Hz, H-2/6), 7.46 (2H, d, *J* = 8.0 Hz, H-3/5), 7.57 (1H, t, *J* = 8.0 Hz, H-4), 7.46 (2H, d, *J* = 8.0 Hz, H-2/6), 7.44 (2H, d, *J* = 8.0 Hz, H-3/5), 7.38 (1H, t, *J* = 8.0 Hz, H-4), 5.39 (2H, s, H-7); 13C-NMR (100 MHz, CDCl3) **C (ppm): 130.0 (C-1), 129.6 (C-2/6), 128.3 (C-3/5), 132.9 (C-4), 166.3 (C-7), 136.0 (C-1), 128.1 (C-2/6), 128.5 (C-3/5), 128.0 (C-4), 66.6 (C-7).

*Bavinol A (****4****)*: Colorless oil; UV *λ*max (MeOH): 280, 225 nm; IR (KBr) *ν*max 3372, 2924, 1618, 1589, 1549, 1420, 1018, 967 cm-1;HRFABMS *m*/*z* 232.1829 [M]+ (Calcd for C16H24O, 232.1827); 1H-NMR (400 MHz, CDCl3) **H (ppm): 7.11 (2H, d, *J* = 8.0 Hz, H-2/6), 6.83 (2H, d, *J* = 8.0 Hz, H-3/5), 3.40 (2H, d, *J* = 6.0 Hz, H-1), 5.58 (2H, m, H-2/3), 2.21 (2H, m, H-4), 1.39-1.48 (10H, m, H-5-H9), 0.98 (3H, t, *J* = 6.8 Hz, H-10), 5.91 (1H, s, 1-OH); 13C-NMR (100 MHz, CDCl3) **C (ppm): 153.5 (C-1), 115.5 (C-2/6), 129.6 (C-3/5), 133.7 (C-4), 32.7 (C-1), 128.5 (C-2), 130.9 (C-3), 22.8-32.0 (C-4/5/6/7/8/9), 14.2 (C-10).

*Trans-phytol* *(****5****):* Colorless oil; [α]Combin + 9.7 (*c* 0.05, CHCl3); UV *λ*max (MeOH): 220 nm; IR (KBr) *ν*max 3400, 2958, 2926, 1658, 1464, 910 cm-1; 1H-NMR (400 MHz, CDCl3) **H (ppm): 4.11 (2H, d, *J* = 6.8 Hz, H-1), 5.37 (1H, t, *J* = 6.8 Hz, H-2), 1.96 (2H, t, *J* = 8.0 Hz, H-4), 1.36 (2H, m, H-5), 1.03 (4H, m, H-6a, 8a, 10a, 12a), 1.22 (4H, m, H-6b, 8b, 10b, 12b), 1.34 (1H, m, H-7), 1.15 (2H, m, H-9), 1.34 (1H, m, H-11), 1.24 (2H, m, H-13), 1.10 (2H, m, H-14), 1.48 (1H, m, H-15), 0.84 (6H, d, *J* = 6.4 Hz, H-16/H-17), 0.82 (6H, d, *J* = 6.4 Hz, H-18/H-19), 1.63 (3H, s, H-20); 13C-NMR (100 MHz, CDCl3) **C (ppm): 59.6 (C-1), 123.3 (C-2), 140.5 (C-3), 40.1 (C-4), 25.3 (C-5), 36.9 (C-6), 33.0 (C-7), 34.6 (C-8), 24.7 (C-9), 37.6 (C-10), 32.9 (C-11), 37.5 (C-12), 25.0 (C-13), 39.6 (C-14), 28.2 (C-15), 22.8 (C-16), 22.9 (C-17), 19.9 (C-18), 19.9 (C-19), 16.4 (C-20).

*2-methoxybenzyl benzoate* *(****6****):* White amorphous powder; M.p 82-84 C; IR (KBr) *ν*max 2839, 1712 (C=O), 1606, 1511, 1256, 1167, 1029, 910 cm-1; HRESIMS *m*/*z* 241.1213 [M  H] (Calcd for C15H13O3, 241.1207); 1H-NMR (400 MHz, CDCl3) **H (ppm): 8.11 (2H, d, *J* = 8.0 Hz, H-2/6), 7.44 (2H, d, *J* = 8.0 Hz, H-3/5), 7.55 (1H, t, *J* = 8.0 Hz, H-4), 6.92 (1H, d, *J* = 8.0 Hz, H-3), 7.34 (1H, t, *J* = 8.0 Hz, H-4), 6.99 (1H, t, *J* = 8.0 Hz, H-5), 7.44 (1H, d, *J* = 8.0 Hz, H-6), 5.44 (2H, s, H-7), 3.86 (3H, s, 2-OCH3); 13C-NMR (100 MHz, CDCl3) **C (ppm): 130.9 (C-1), 130.1 (C-2/6), 129.8 (C-3/5), 133.2 (C-4), 167.0 (C-7), 124.9 (C-1), 158.0 (C-2), 110.9 (C-3), 129.8 (C-4), 120.9 (C-5), 128.7 (C-6), 62.6 (C-7), 55.9 (2-OCH3).

*(–)-6-acetylzeylenol**(****7****):* Colorless solid; [α]Combin  42.3 (*c* 1.1, Acetone); UV *λ*max (MeOH): 228, 275 nm; IR (KBr) *ν*max 3450, 2960, 1724, 1612, 1589, 1510, 1458, 1116, 1070, 712 cm-1; HRFABMS *m*/*z* 427.1393 [M + H]+ (Calcd for C23H23O8, 427.1393); CD (Acetone): ∆*ε*236 – 6.24, ∆*ε*282 + 4.32; 1H-NMR (400 MHz, acetone-*d*6) **H (ppm): 4.29 (1H, *dd*, *J* = 4.4, 8.4 Hz, H-2), 5.77 (1H, dt, *J* = 2.0, 4.4, 10.4 Hz, H-3), 5.95 (1H, dt, *J* = 2.4, 4.8, 10.4 Hz, H-4), 5.87 (1H, m, H-5), 5.68 (1H, dd, *J* = 2.4, 4.8 Hz, H-6), 4.70 (1H, d, *J* = 11.2 Hz, H-7a), 4.67 (1H, d, *J* = 11.2 Hz, H-7b), 5.10 (1H, d, *J* = 4.4 Hz, 2-OH), 4.90 (1H, s, 1-OH), 8.08 (4H, m, H-2/2/6/6), 7.64 (2H, m, H-4/4), 7.52 (4H, m, H3/3/5/5), 2.02 (3H, s, 6-OAc); 13C-NMR (100 MHz, acetone-*d*6) **C (ppm): 76.3 (C-1), 75.6 (C-2), 129.8 (C-3), 128.0 (C-4), 75.0 (C-6), 75.8 (C-6), 63.2 (C-7), 166.7 (C-1), 166.6 (C-1), 131.2 (C-1), 131.1 (C-1), 130.5 (C-2/6), 130.4 (C-2/6), 129.4 (C-3/5/3/5), 134.0 (C-4/4), 171.0 (6-OCOCH3), 20.9 (6-OCOCH3).

*Cucumegastigmane**I (****8****):* White powder; [α]Combin + 67.5 (*c* 0.1, MeOH); UV *λ*max (MeOH): 238 nm; IR (KBr) *ν*max 3410, 2978, 2924, 1627, 1589, 1508, 1448, 1166, 1068, 856 cm-1; HRESIMS *m*/*z* 263.1244 [M + Na]+ (Calcd for C13H20O4Na, 263.1259); CD (MeOH): ∆*ε*242 + 11.56, ∆*ε*314  1.12; 1H-NMR (400 MHz, methanol-*d*4) **H (ppm): 2.56 (1H, d, *J* = 16.8 Hz, H-2a), 2.19 (1H, d, *J* = 16.8 Hz, H-2b), 5.91 (1H, d, *J* = 1.2 Hz, H-4), 5.93 (1H, dd, *J* = 1.8, 15.6 Hz, H-7), 5.83 (1H, dd, *J* = 5.6, 15.6 Hz, H-8), 4.23 (1H, m, H-9), 3.54 (1H, dd, *J* = 4.8, 11.2 Hz, H-10a), 3.49 (1H, dd, *J* = 6.4, 11.2 Hz, H-10b), 1.07 (3H, s, H-11), 1.05 (3H, s, H-12), 1.95 (3H, d, *J* = 1.2 Hz, H-13); 13C-NMR (100 MHz, methanol-*d*4) **C (ppm): 42.3 (C-1), 50.6 (C-2), 200.7 (C-3), 126.9 (C-4), 166.9 (C-5), 80.0 (C-6), 123.2 (C-7), 132.1 (C-8), 73.5 (C-9), 67.1 (C-10), 23.4 (C-11), 24.5 (C-12), 19.6 (C-13).

*2.4. Cell culture.* RAW 264.7 cells were obtained from the American Type Culture Collection (Rockville, MD). These cells were maintained at sub-confluence in a humidified 5% CO2 and atmosphere at 37 °C. The medium used for routine sub-cultivation was Dulbecco’s Modified Eagle’s Medium (DMEM, Gibco, Grand Island, NY, USA), supplemented with 10% fetal bovine serum (FBS), penicillin (100 units/mL), and streptomycin (100 μg/mL). Cells were counted with a hemocytometer and the number of viable cells was determined by trypan blue dye exclusion.

*2.5. Cell viability assay.* The viability assay was evaluated by MTS [3-(4,5-Dimethylthiazol-2-yl)-5-(3-carboxymethoxyphenyl)-2-(4-sulfophenyl)-2*H*-tetrazolium] assay [12]. Briefly, 100 μL cells (5 × 103 cells per well) in medium (DMEM supplemented with 10% FBS and 1% pennicilin-streptomcycin) were plated in 96-well plate and incubated for 24 hours at 37 oC in a humidified atmosphere incubator with 5% CO2. The medium then washed and added with 99 μL new medium and 1 μL of each compound in different concentration and DMSO in triplicate then the plate were incubated for 24 hours. Untreated cells were served as the control. Briefly, 20 μL MTS was added to each well. The plate was incubated in 5% CO2 at 37 oC incubator for 4 hours. The absorbance was measured at 490 nm on a microplate reader (Molecular Devices, Emax, Sunnyvale, CA, USA).

*2.6. Determination of NO Production*. The level of NO production was determined by measuring the amount of nitrite present in cell culture supernatants as described previously [13-15]. Briefly, the RAW264.7 cells (1 × 105 cells/well) were stimulated with or without 1 μg/mL of LPS (Sigma Chemical Co., St. Louis, MO) for 24 h in the presence or absence of the test compounds (0.530 μM). The cell culture supernatant (100 μL) was then reacted with 100 μL of Griess reagent (1% sulfanilamide in 5% phosphoric acid and 0.1% naphthyl ethylene diamine dihydrochloride in distilled water). The absorbance at 540 nm was determined with a microplate reader (Molecular Devices, Emax, Sunnyvale, CA, USA), and the absorption coefficient was calibrated using a sodium nitrite solution standard. For this experiment, celastrol was used as a positive control [13,14].

*2.7. Immunoblot Analysis*. Proteins were extracted from cells in ice-cold lysis buffer (50 mM Tris-HCl, pH 7.5, 1% Nonidet P-40, 1 mM EDTA, 1 mM phenyl methyl sulfonyl fluoride, 1 μg/mL leupeptin, 1 mM sodium vanadate, 150 mM NaCl). Fifty μg of protein (for iNOS and COX-2) per lane was separated by sodium dodecyl sulfate (SDS)-polyacrylamide gel electrophoresis (PAGE), and transferred to a polyvinylidene difluoride membrane (Millipore, Bedford, MA, USA). The membrane was blocked with 5% skim milk and then incubated with the corresponding antibody. Antibodies for iNOS and COX-2 were obtained from Santa Cruz Biotechnology (Santa Cruz, CA, USA). Antibody for α-tubulin was from Sigma. After binding of an appropriate secondary antibody coupled to horseradish peroxidase, proteins were visualized by enhanced chemiluminescence according to the instructions of the manufacturer (Amersham Pharmacia Biotec, Buckinghamshire, UK) [16].

*Statistical Analysis*.[NO production](https://www.ncbi.nlm.nih.gov/pmc/articles/PMC2984114/) inhibitory activity assay was performed in triplicate. The results are presented as the means ± standard error of the mean.

**Figure S1.** HR-ESI mass spectrum of compound **1**.


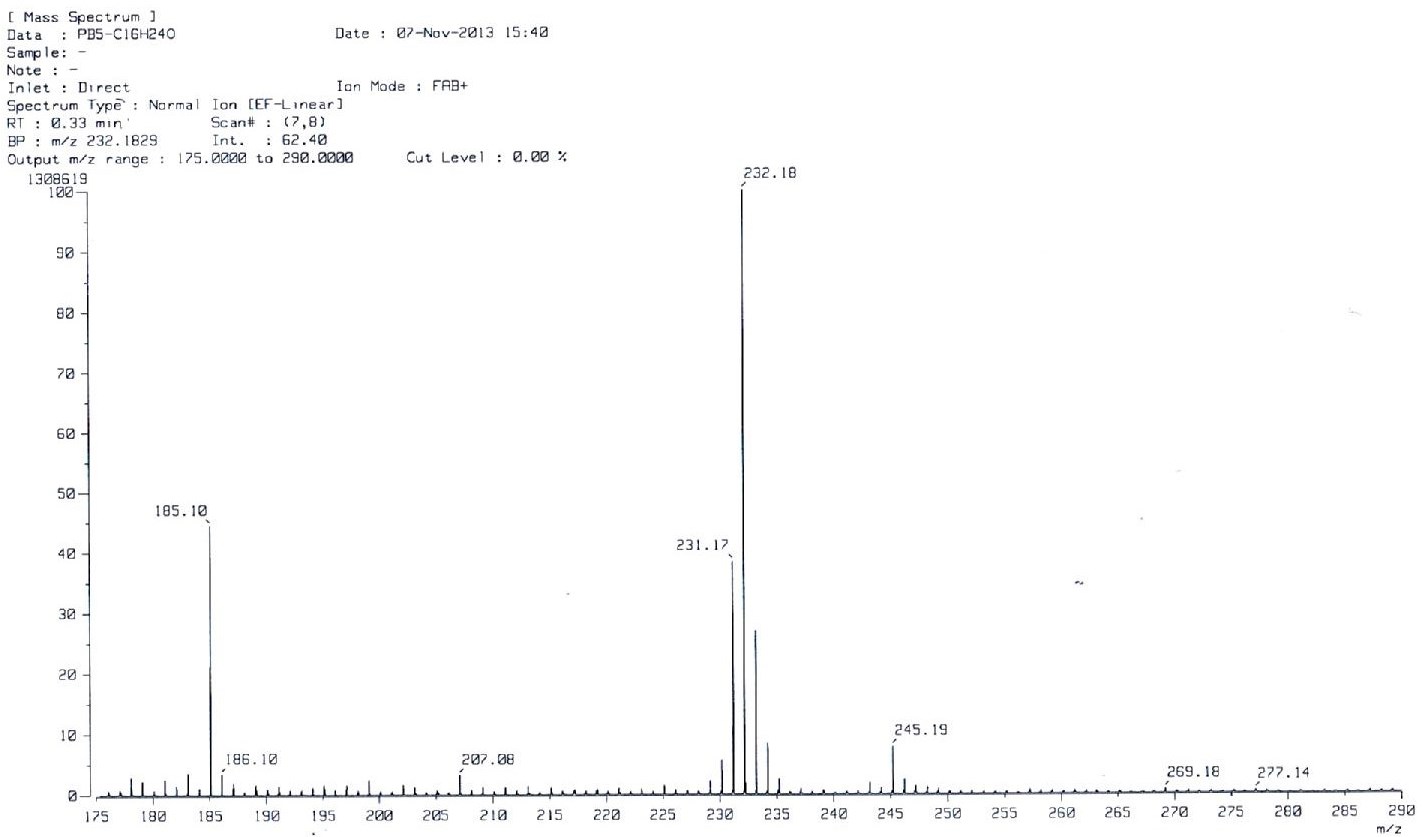


**Figure S2.** HR-FAB mass spectrum of compound **4**.

**Figure S3.** HR-ESI mass spectrum of compound **6**.


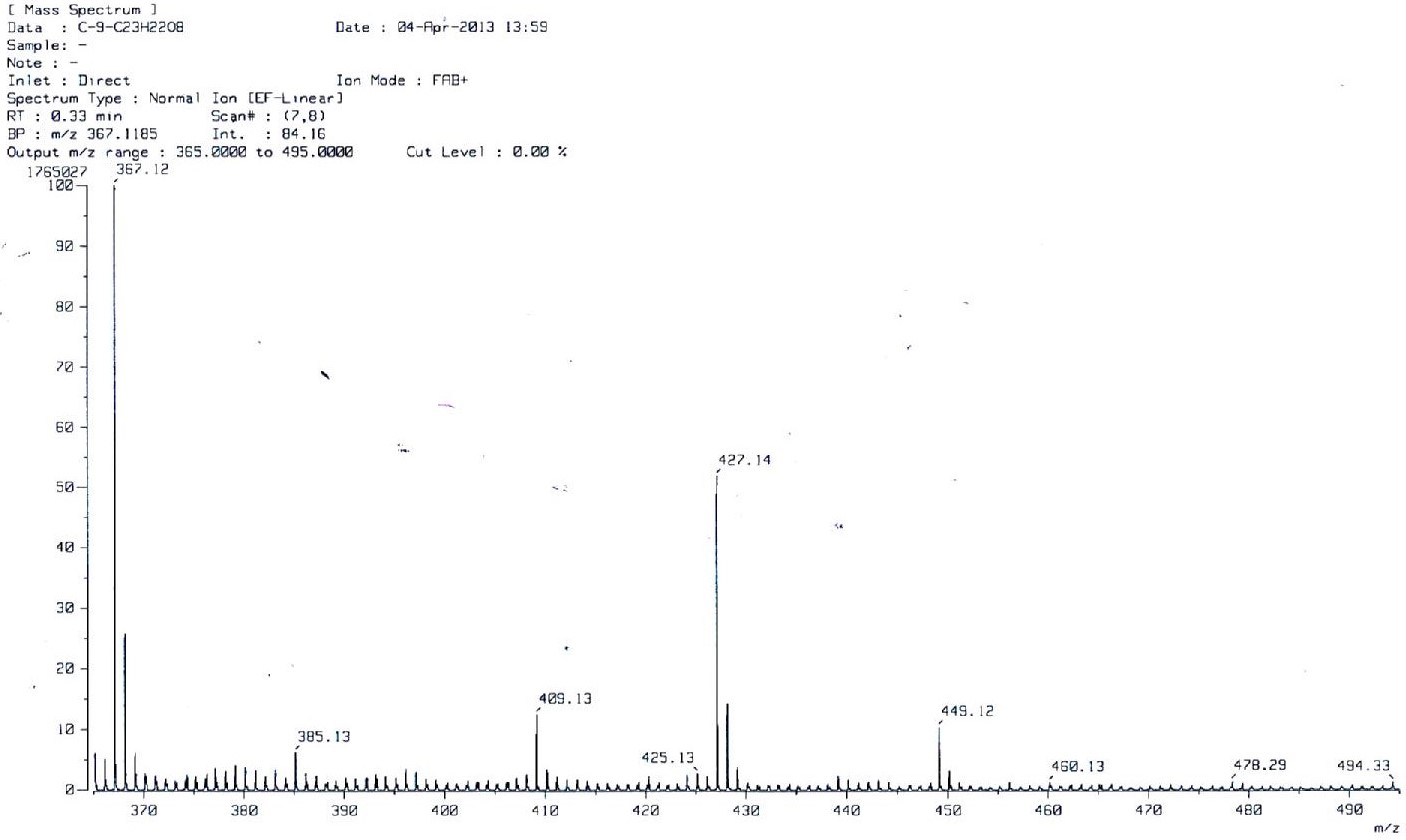


**Figure S4.** HR-FAB mass spectrum of compound **7**.

**Figure S5.** HR-ESI mass spectrum of compound **8**.
